# Supplementary material for: Constructing Cell-Free Expression Systems for Low-Cost Access
Source: PubMed Central journal article supplement (PMC9098194; doi:10.1021/acssynbio.1c00342), 2022-03-08
Supplement: sb1c00342_si_001.pdf [file sb1c00342_si_001.pdf]

## SUPPLEMENTARY MATERIALS

### Constructing cell-free expression systems for low-cost access

Fernando Guzman-Chavez<sup>1</sup>; Anibal Arce<sup>2</sup>; Abhinav Adhikari<sup>3‡</sup>; Sandra Vadhin<sup>3‡</sup>; Jose Antonio Pedroza-Garcia<sup>4</sup>; Chiara Gandini<sup>5</sup>; Jim W, Ajioka<sup>6</sup>; Jenny Molloy<sup>5</sup>; Sobeida Sanchez-Nieto<sup>4</sup>; Jeffrey D. Varner<sup>3</sup>; Fernan Federici<sup>2</sup> & Jim Haseloff<sup>1\*</sup>.

‡ These authors contributed equally

<sup>1</sup> Department of Plant Sciences, University of Cambridge, CB2 3EA, Cambridge, U.K.

<sup>2</sup> ANID – Millennium Institute for Integrative Biology (iBio), FONDAP Center for Genome Regulation, Institute for Biological and Medical Engineering, Schools of Engineering, Medicine and Biological Sciences, Pontificia Universidad Católica de Chile, Santiago 8330005, Chile.

<sup>3</sup> Robert Frederick Smith School of Chemical and Biomolecular Engineering, Cornell University, 14853, Ithaca, NY, USA.

<sup>4</sup> Department of Biochemistry, Faculty of Chemistry, National Autonomous University of Mexico (UNAM), 04510, Mexico City, Mexico.

<sup>5</sup> Department of Chemical Engineering and Biotechnology, University of Cambridge, CB3 0FD Cambridge, U.K.

<sup>6</sup> Department of Pathology, University of Cambridge, Tennis Court Road, CB2 1QP Cambridge, U.K.

\* Corresponding Author

jh295@cam.ac.uk



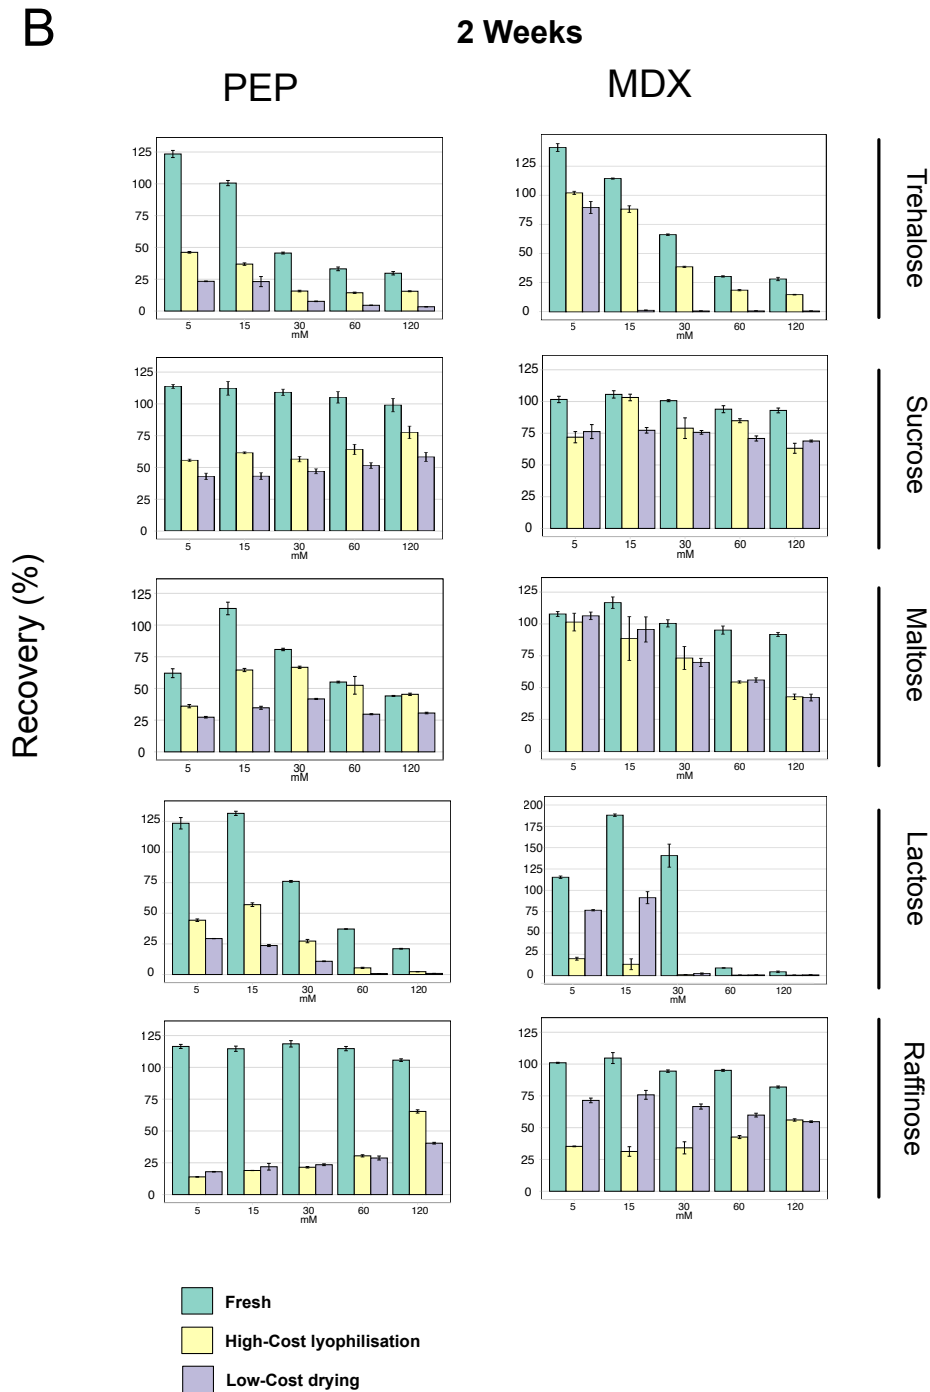

**Figure S1. Lyoprotectant effects of five sugars individually added to the two cell-free formulations.** Duplicate reactions, showing the effects of five sugars individually added as potential lyoprotectants to the two cell-free formulations based on PEP (A-E) and MDX (F-J) and dehydrated either by high-cost lyophilization or the low-cost drying method. Samples were dried and stored at room temperature for A) 1 day and B) 2 weeks. Cell-free reactions were rehydrated and incubated at 29°C for 15h. Plasmid psfGFP (Table S9) was used as DNA template. The final concentrations of additives in the reactions are indicated on the horizontal axes. The percentage of recovered protein production was calculated relative to that seen in fresh, additive-free reactions with the energy sources PEP or MX. Error bars represent standard deviations over three technical measurements.



Figure S3

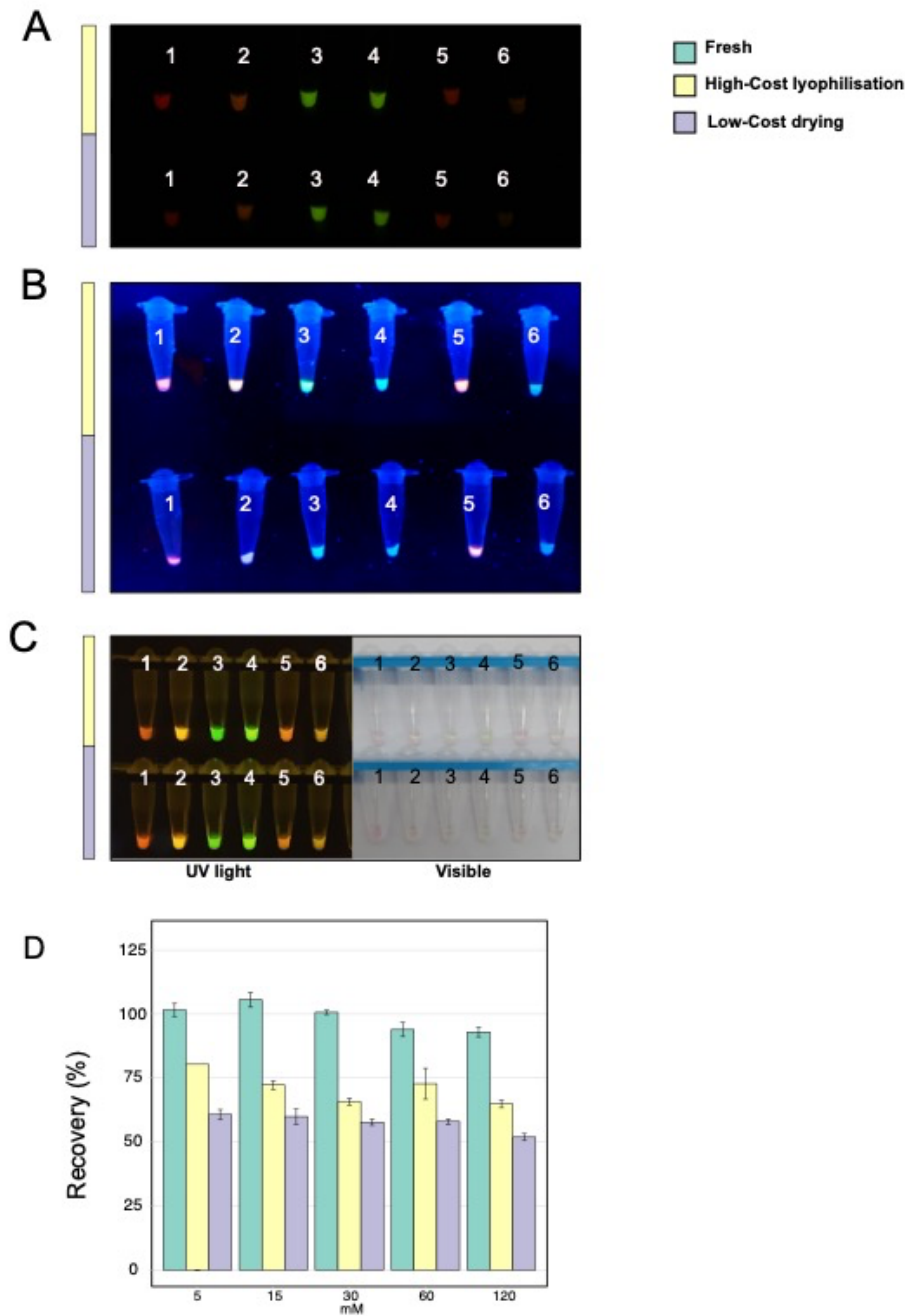

**Figure S3. Sharing lyophilised and dried cell-free reactions around the globe.** Fluorescent protein production after 2 weeks (A-B) and 3 months (C-D) of lyophilisation using a high and low-cost device (yellow and purple bars, respectively). A-C) Sucrose (15 mM) was added as lyoprotectant and MDX as energy source. Samples were rehydrated in A) Chile, B) Mexico and C) UK and visualized using a UV transilluminator. Fluorescent proteins produced: 1) pJL1-eforRed, 2) pJL1-dTomato, 3) psfGFP, 4) pFGC-T7-RibJ-mTFP1, 5) pFGC-T7-RibJ-mScarlet, 6) pFGC-T7-RibJ-RRvT. Image representative of three technical samples. D) Lyoprotectant effect of sucrose in the cell-free formulations based on MDX and dehydrated either by high-cost lyophilization or the low-cost drying method. Samples were stored at room temperature for 3 months. Final concentrations of sucrose in 12  $\mu$ L in the lyophilised samples are indicated. Percentage of recovery in protein production was calculated using as 100% the RFU value from sugar free and fresh conditions. Cell-free reactions were incubated at 29°C for 15h. Error bars are representative of three technical measurements.

Figure S4

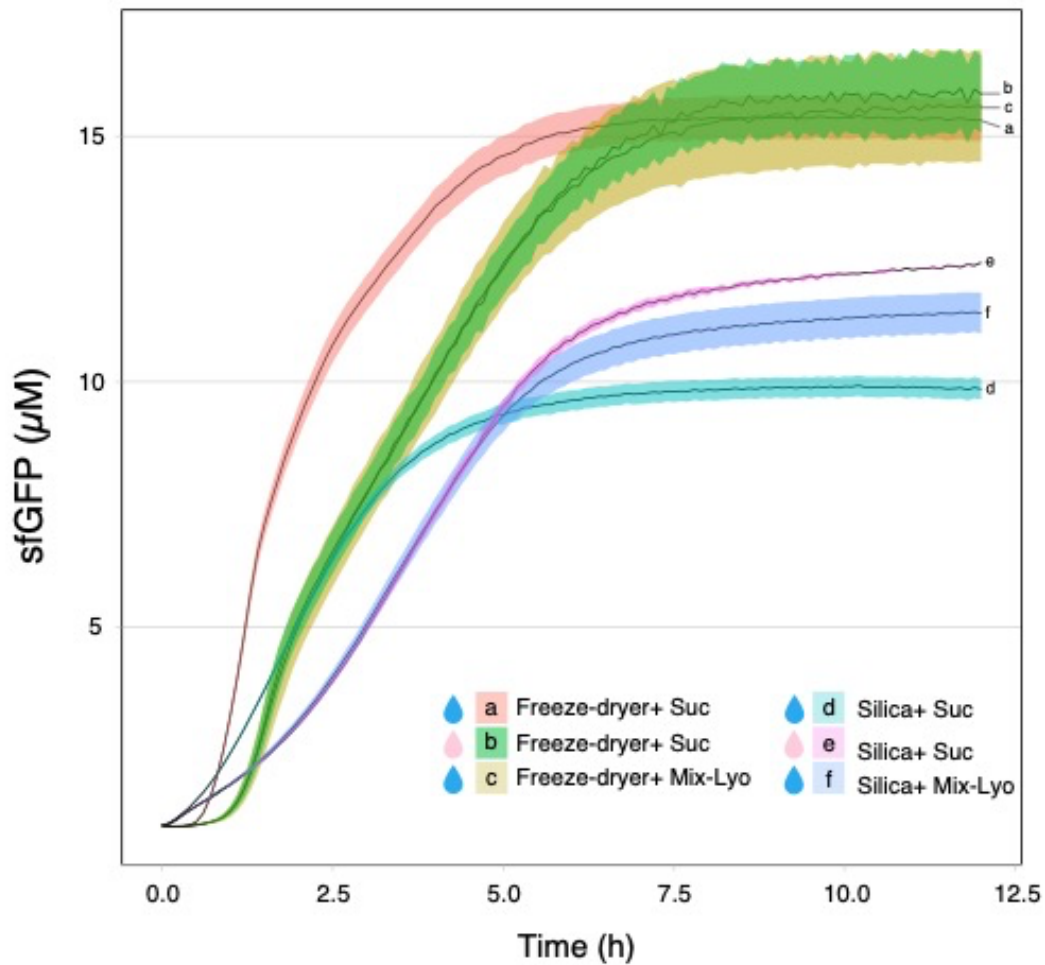

**Figure S4.- Effect of lactose in cell-free reactions before and after being added during the lyophilisation/drying process.** GFP production after 2 weeks of dehydration either by freeze-drying or the low-cost silica method. All the samples were tested in the cell-free formulation based on MDX.Plasmid psfGFP (Table S9) was used as DNA template. Sucrose (15 mM) or a mixture of 15 mM sucrose and 15 mM lactose (Mix-Lyo) were added as lyoprotectants. Samples were rehydrated with MQ water (blue drop) or lactose 13.7 mM (pink drop). Cell-free reactions were incubated at 29°C for 12.5 h. All error bars represent standard error over two biological replicates based on three technical measurements

Figure S5

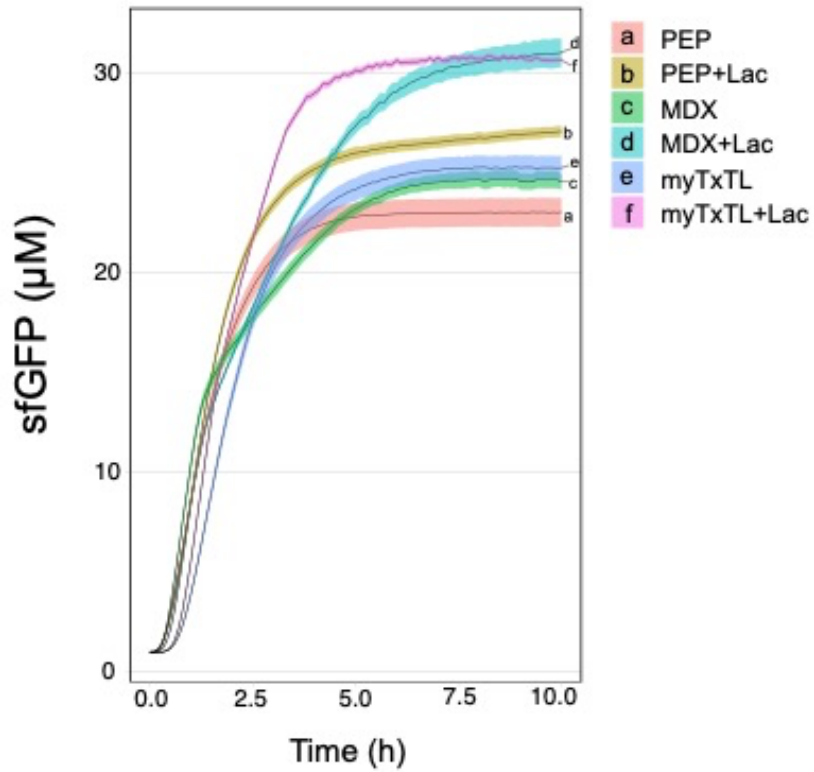

**Figure S5.- Enhancer effect of lactose over sfGFP production in fresh cell-free reactions in three different formulations (PEP, MDX or commercial version).** All the reactions were supplemented with 5 nM linear DNA and when was indicated 11.2 and 13.7 mM lactose was added in PEP and MDX mixture respectively. For commercial cell-free systems, 13.7 mM lactose was used. Cell-free reactions were incubated at 29°C for 10h. All error bars represent standard error over two biological replicates based on four technical measurements

Figure S6

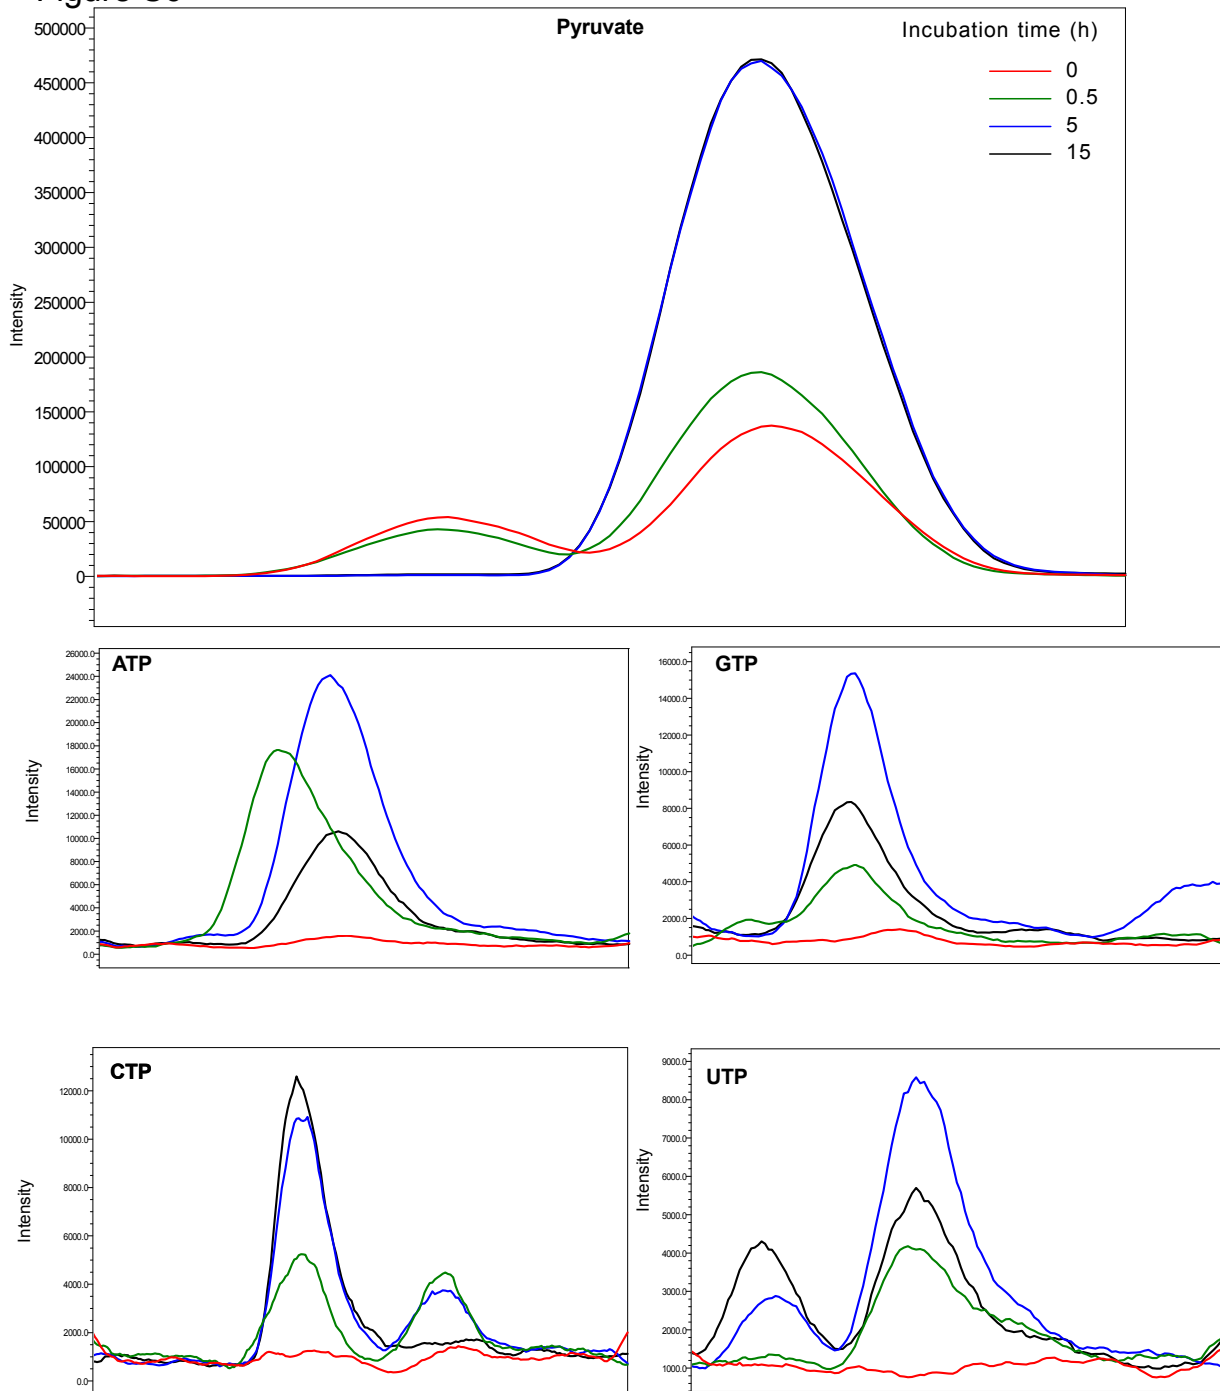

**Figure S6.- Chromatograms of NTPs and pyruvate detection by LC-MS at four time points.** Samples were prepared as described in table S13, replacing the indicated volume DNA with MQ water. CF presented were not supplemented with 11.2 mM lactose.



Figure S7

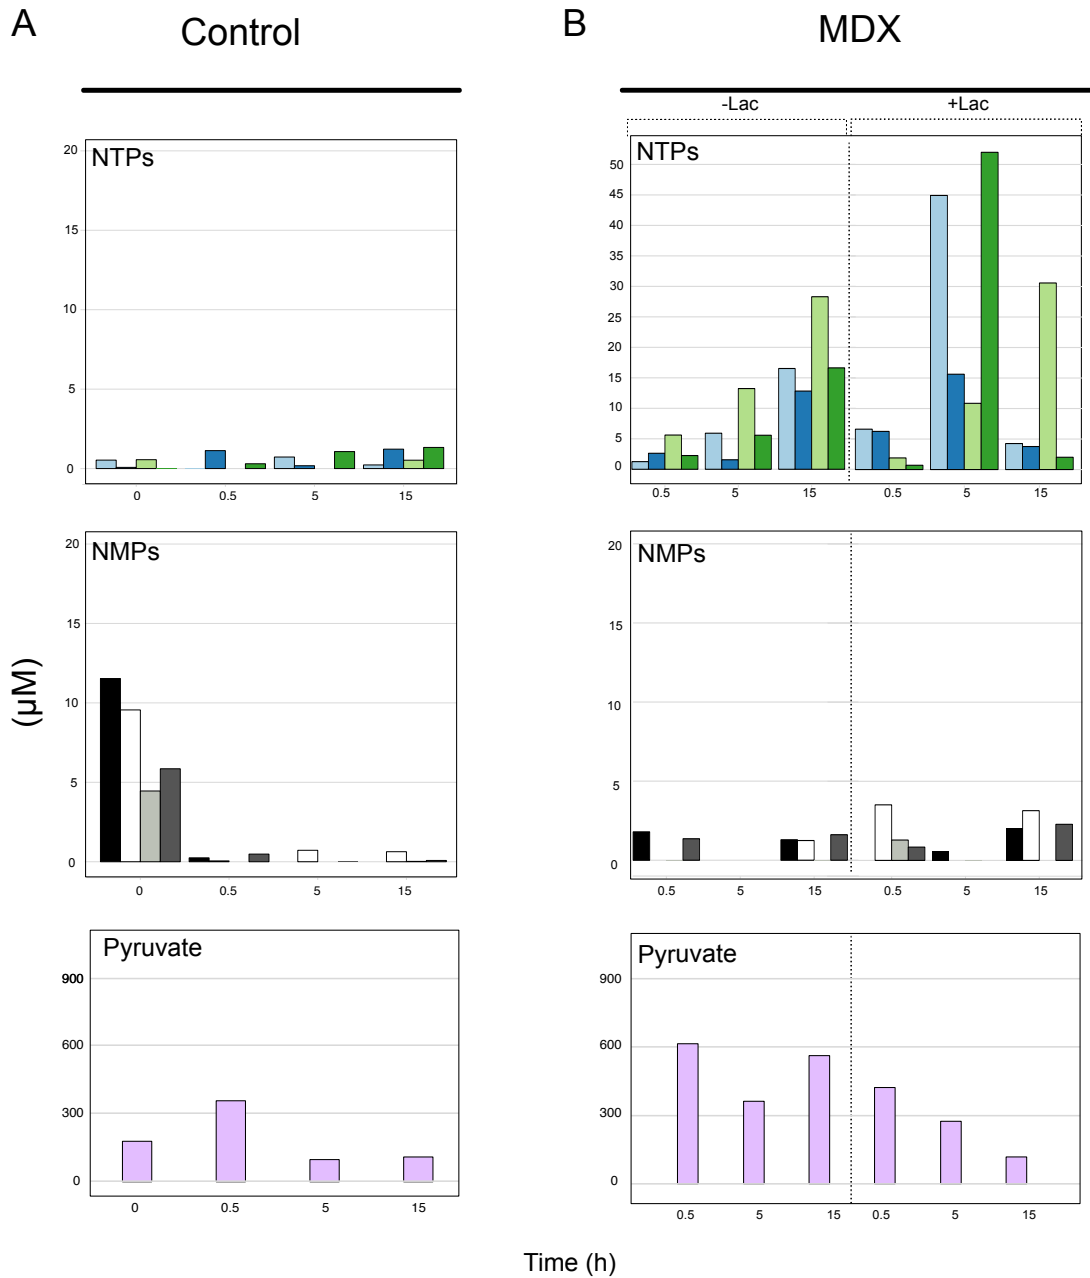

**Figure S7.- Regeneration of NMPs, NTPs and pyruvate during the cell-free reactions.** CFPS without A) PEP or MDX (control) and B) supplemented with MDX and lactose, measured by LC-MS at four time points. Control samples (A), which are free of any energy source as PEP or MDX, were prepared as described in Table S13, replacing PEP from the 4x ULC-Wizard mixture and DNA template with MQ water in both cases. Samples supplemented with MDX and lactose (B), were prepared as described in Table S1, keeping MDX and HEPES in the 10X energy solution according with Table S8B, variant 11. Concentrations of nucleotides and pyruvate were measured by LC-MS.

Figure S8

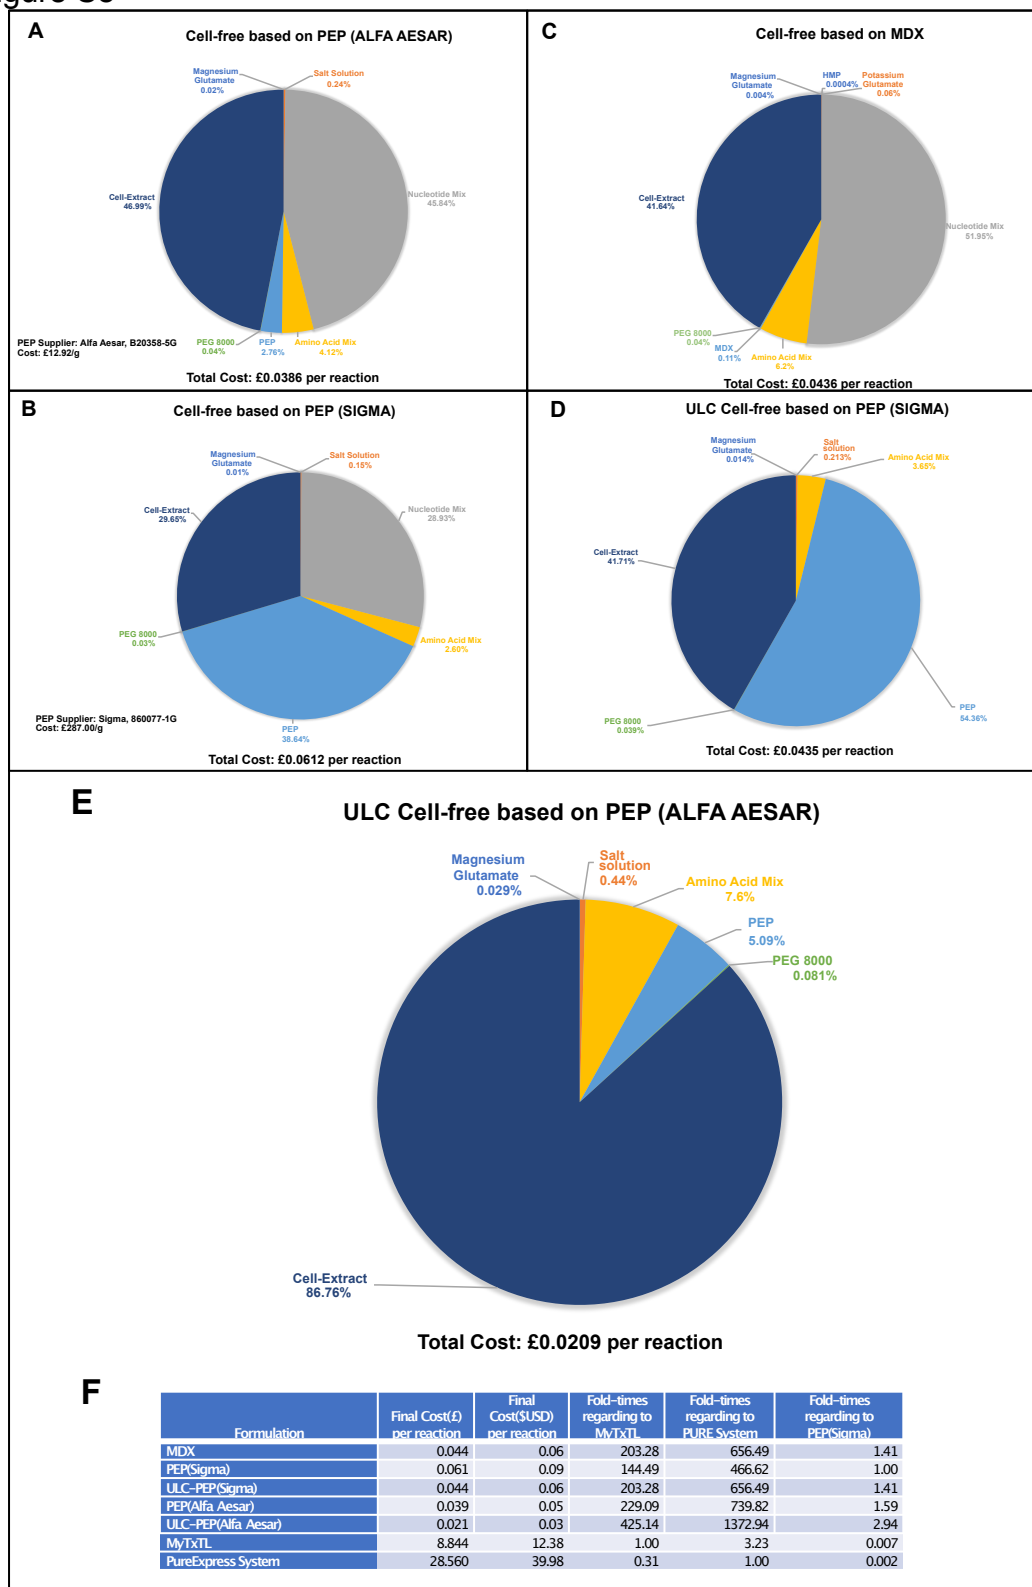

**Figure S8.- Cost comparison between five different cell-free formulations.** A) Using low-cost PEP from supplier A B) Using high-cost PEP from supplier B . C) MDX. D) ULC cell-free with PEP from supplier B. E) ULC cell-free with PEP from supplier A. F) Cost comparison versus a commercial cell-free kit (myTxTL-Linear DNA Expression Kit, Arbor 508024) and the cell-free formulation based on PEP from supplier B. Cost calculated based on a single cell-free reaction of 12 uL volume. Supplier A: Alfa Aesar. Supplier B: Sigma.

**Table S1.-** Energy mix composition based on MDX for fresh samples

| Energy source:<br><b>Maltodextrin</b>   |                |                |
|-----------------------------------------|----------------|----------------|
| Type of sample:<br><b>Fresh samples</b> |                |                |
|                                         | Non-sugar      | Sugar          |
|                                         | Vol ( $\mu$ L) | Vol ( $\mu$ L) |
| Cell-extract                            | 4              | 4              |
| 2.5X Rxn-Buffer*                        | 4.8            | 4.8            |
| **DNA (60nM)                            | 1              | 1              |
| MQ water                                | 2.2            | 0.49           |
| Sugar                                   | n.a.           | 1.71           |
| Final volume                            | 12             | 12             |

**Table S3.-** Energy mix composition based on MDX for lyophilisation mix

| Energy source:<br><b>Maltodextrin</b>             |                |                |
|---------------------------------------------------|----------------|----------------|
| Type of sample:<br><b>Lyophilization mix (LM)</b> |                |                |
|                                                   | Non-sugar      | Sugar          |
|                                                   | Vol ( $\mu$ L) | Vol ( $\mu$ L) |
| Cell-extract                                      | 4              | 4              |
| 2.5X Rxn-buffer*                                  | 4.8            | 4.8            |
| **DNA                                             | n.a.           | n.a.           |
| MQ water                                          | 2.2            | 0.49           |
| Sugar                                             | 0              | 1.71           |
| Final volume                                      | <b>11</b>      | <b>11</b>      |

**Table S2.-** Energy mix composition based on PEP for fresh samples

| Energy source:<br><b>PEP</b>            |                |                |
|-----------------------------------------|----------------|----------------|
| Type of sample:<br><b>Fresh samples</b> |                |                |
|                                         | Non-sugar      | Sugar          |
|                                         | Vol ( $\mu$ L) | Vol ( $\mu$ L) |
| Cell-extract                            | 4              | 4              |
| 4X Wizard mix*                          | 3              | 3              |
| **DNA (20nM)                            | 3              | 3              |
| 40% PEG-8000                            | 0.6            | 0.6            |
| MQ water                                | 1.4            | 0              |
| Sugar                                   | 0              | 1.4            |
| Final volume                            | 12             | 12             |

**Table S4.-** Energy mix composition based on PEP for lyophilisation mix

| Energy source:<br><b>PEP</b>                      |                |                |
|---------------------------------------------------|----------------|----------------|
| Type of sample:<br><b>Lyophilization mix (LM)</b> |                |                |
|                                                   | Non-sugar      | Sugar          |
|                                                   | Vol ( $\mu$ L) | Vol ( $\mu$ L) |
| Cell-extract                                      | 4              | 4              |
| 4X Wizard mix*                                    | 3              | 3              |
| **DNA                                             | n.a.           | n.a.           |
| 40% PEG-8000                                      | 0.6            | 0.6            |
| MQ water                                          | 1.4            | 0              |
| Sugar                                             | 0              | 1.4            |
| Final volume                                      | <b>9</b>       | <b>9</b>       |

\* Detailed protocols for preparing all cell-free stock solutions used in this study are available at [protocols.io/researchers/fernando-guzman-chavez](https://protocols.io/researchers/fernando-guzman-chavez)

\*\*Linear or circular DNA

**Table S5.-** Sugar concentration used in Lyophilisation Mix (LM) and fresh samples

| Sugar | Stock concentration (mM) | Concentration at LM (PEP or MDX) (mM) | Concentration in cell-free reaction PEP (mM) | Concentration in cell-free reaction MDX (mM) |
|-------|--------------------------|---------------------------------------|----------------------------------------------|----------------------------------------------|
| 120   | 771.36                   | 120                                   | 90.0                                         | 110.0                                        |
| 60    | 385.68                   | 60                                    | 45.0                                         | 55.0                                         |
| 30    | 192.84                   | 30                                    | 22.5                                         | 27.5                                         |
| 15    | 96.42                    | 15                                    | 11.2                                         | 13.7                                         |
| 5     | 32.14                    | 5                                     | 3.7                                          | 4.6                                          |

**Table S6.-** Sugars used in this study

| Sugar o lyoprotectants | Cat. Number                  | MW(g/mol) |
|------------------------|------------------------------|-----------|
| D-(+)-Trehalose        | Merk, 1.08216.0010           | 342.3     |
| D-(+)-Lactose          | Sigma, 61339-25G             | 360.3     |
| D-(+)-Sucrose          | Fisher Scientific, S/8600/60 | 342.3     |
| D-(+)-Maltose          | Sigma, M5885-100G            | 360.3     |
| D-(+)-Raffinose        | Melford, R20500-25           | 594.5     |

**Table S7.-** Composition of each of the 25X nucleotide mix variants tested

**A)**

| Reagent                     | Formula weight (g/mol) | Concentration in 25x nucleotide mix | Concentration in cell-free reaction | Required volume (μL) or mass (g) of precursor solution |
|-----------------------------|------------------------|-------------------------------------|-------------------------------------|--------------------------------------------------------|
| 1000 mM Putrescine          | 88.15                  | 25 mM                               | 1 mM                                | 125 μL                                                 |
| 1500 mM Spermidine solution | 145.25                 | 37.5 mM                             | 1.5 mM                              | 125 μL                                                 |
| 50 mM NAD                   | 663.40                 | 8.3 mM                              | 0.33mM                              | 830 μL                                                 |
| ATP                         | 583.36                 | 30 mM                               | 1.2 mM                              | 0.0875 g                                               |
| CTP                         | 527.12                 | 21.5 mM                             | 0.86 mM                             | 0.0566 g                                               |
| GTP                         | 567.1                  | 21.5 mM                             | 0.86 mM                             | 0.0609 g                                               |
| UTP                         | 586.12                 | 21.5 mM                             | 0.86 mM                             | 0.0630 g                                               |
| CoA                         | 767.50                 | 6.8 mM                              | 0.27 mM                             | 0.0260 g                                               |
| MRE600 <i>E.coli</i> tRNA   | n.a.                   | 4.3 mg/mL                           | 170 μg/mL                           | 215 μL                                                 |
| Folnic acid                 | 511.50                 | 0.9 mg/mL                           | 34 μg/mL                            | 45 μL                                                  |

**B)**

| Reagent     | 1 | 2 | 3 | 4 | 5 | 6 | 7 | 8 | 9 | 10 | 11 |
|-------------|---|---|---|---|---|---|---|---|---|----|----|
| CoA         |   |   |   |   |   |   |   |   |   |    |    |
| tRNA        |   |   |   |   |   |   |   |   |   |    |    |
| NAD         |   |   |   |   |   |   |   |   |   |    |    |
| Putrescine  |   |   |   |   |   |   |   |   |   |    |    |
| Spermidine  |   |   |   |   |   |   |   |   |   |    |    |
| CTP         |   |   |   |   |   |   |   |   |   |    |    |
| GTP         |   |   |   |   |   |   |   |   |   |    |    |
| UTP         |   |   |   |   |   |   |   |   |   |    |    |
| Folnic acid |   |   |   |   |   |   |   |   |   |    |    |
| ATP         |   |   |   |   |   |   |   |   |   |    |    |

 Indicates substrate added

**TABLE S8.-** Composition of each of the 10X energy solution variants tested**A)**

| Reagent                   | Formula weight (g/mol)                                   | Concentration in 10X energy solution | Concentration in cell-free reaction | Required volume (μL) of precursor solution |
|---------------------------|----------------------------------------------------------|--------------------------------------|-------------------------------------|--------------------------------------------|
| HEPES pH8                 | 238.2                                                    | 510 mM                               | 51 mM                               | 1000                                       |
| Nucleotide mix            | ATP: 583.36<br>CTP: 527.12<br>GTP: 567.10<br>UTP: 586.12 | 15mM A,G<br>14 mM C,U                | 1.5 mM A,G<br>1.4 mM C,U            | 396                                        |
| MRE600 <i>E.coli</i> tRNA | n.a.                                                     | 2.02 mg/mL                           | 202 μg/mL                           | 160                                        |
| NAD                       | 663.4                                                    | 3.39 mM                              | 0.339mM                             | 76.6                                       |
| CoA                       | 767.50                                                   | 2.63 mM                              | 0.263 mM                            | 160                                        |
| cAMP                      | 329.22                                                   | 7.56 mM                              | 0.756 mM                            | 46                                         |
| Folinic acid              | 511.50                                                   | 0.68 mM                              | 0.068 mM                            | 80                                         |
| Spermidine                | 145.25                                                   | 7.71 mM                              | 0.77 mM                             | 34                                         |
| Maltodextrin              | n.a.                                                     | 121.44 mg/mL                         | 12.14mg/mL                          | 2000                                       |

**B)**

10 X Energy solution variants

| Reagent      | 1 | 2 | 3 | 4 | 5 | 6 | 7 | 8 | 9 | 10 | 11 |
|--------------|---|---|---|---|---|---|---|---|---|----|----|
| CoA          |   |   |   |   |   |   |   |   |   |    |    |
| tRNA         |   |   |   |   |   |   |   |   |   |    |    |
| NAD          |   |   |   |   |   |   |   |   |   |    |    |
| cAMP         |   |   |   |   |   |   |   |   |   |    |    |
| Spermidine   |   |   |   |   |   |   |   |   |   |    |    |
| CTP          |   |   |   |   |   |   |   |   |   |    |    |
| GTP          |   |   |   |   |   |   |   |   |   |    |    |
| UTP          |   |   |   |   |   |   |   |   |   |    |    |
| Folinic acid |   |   |   |   |   |   |   |   |   |    |    |
| ATP          |   |   |   |   |   |   |   |   |   |    |    |
| Maltodextrin |   |   |   |   |   |   |   |   |   |    |    |
| HEPES, pH8   |   |   |   |   |   |   |   |   |   |    |    |

Indicates substrate added

**Table S10.-** PCR conditions using 4 primers simultaneously.

| Step                 | Temperature (°C) | Time (sec) | Cycles |
|----------------------|------------------|------------|--------|
| Initial denaturation | 98               | 90         | 1      |
| Denaturation         | 98               | 10         | 35     |
| Annealing            | 61               | 20         |        |
| Elongation           | 72               | 60         |        |
| Final elongation     | 72               | 120        | 1      |
| Storage              | 4                | n.a.       | n.a.   |

**Table S9.-** Plasmids used in this study.

| Name                 | Description              | Marker | Reference                                            |
|----------------------|--------------------------|--------|------------------------------------------------------|
| psfGFP               | pT7-RiboJ-sfGFP-T7       | TetR   | Arce et al., 2021 <sup>1</sup>                       |
| pFGC-T7-RJBB*        | pT7-RiboJ-LacZ(-T7       | KanR   | This study                                           |
| pFGC-T7RibJ-mTFP1    | pT7-RiboJ-mTFP1-T7       | KanR   | This study                                           |
| pFGC-T7RibJ-RRvT     | pT7-RiboJ-RRvT-T7        | KanR   | This study                                           |
| pFGC-T7RibJ-mScarlet | pT7-RiboJ-mScarlet-T7    | KanR   | This study                                           |
| pJL1-dTomato         | pT7-dTomato-T7           | KanR   | Stark, et al., 2018 <sup>2</sup><br>Addgene:102631   |
| pJL1-eforRed         | pT7-eforRed-T7           | KanR   | Huang, et al., 2018 <sup>3</sup><br>Addgene:106320   |
| pKAR2-Br512          | pT7-8XHisTag-Br512-tetPA | AmpR   | Mautner et al., 2020 <sup>4</sup><br>Addgene: 161875 |
| iluxpGEX             | Lux operon               | AmpR   | Gregor, et al.,2018 <sup>5</sup>                     |

\* Acceptor or backbone plasmid

**Table S11.-** Primers used in this study.

| Name                                    | Sequence<br>5'→3'                                                                                                                                                                                                                    | Template         | Use                               | Reference                                                                       |
|-----------------------------------------|--------------------------------------------------------------------------------------------------------------------------------------------------------------------------------------------------------------------------------------|------------------|-----------------------------------|---------------------------------------------------------------------------------|
| U1F                                     | CATTACTCGCATCCATTCTCAGGCTGT<br>CTCGTCTCGTCTC                                                                                                                                                                                         | pSfGFP_AA4       | Linear<br>DNA-<br>Long<br>Flanks  | Arce et<br>al., 2021<br><sup>1</sup>                                            |
| UXR                                     | GGTGGAAGGGCTCGGAGTTGTGGTAA<br>TCTATGTATCCTGG                                                                                                                                                                                         | pSfGFP_AA4       | Linear<br>DNA-<br>Long<br>Flanks  | Arce et<br>al., 2021<br><sup>1</sup>                                            |
| 336                                     | AATTAATACGACTCACTATAGGGAGCT<br>G                                                                                                                                                                                                     | pSfGFP_AA4       | Linear<br>DNA-<br>Short<br>Flanks | This study                                                                      |
| 231                                     | CAGCAAAAACCCCTCAAGACCCGTTT<br>AGAGGC                                                                                                                                                                                                 | pSfGFP_AA4       | Linear<br>DNA-<br>Short<br>Flanks | This study                                                                      |
| 292_pT7_RiboJ-<br>FW<br>(Adapter oligo) | CATTACTCGCATCCATTCTCAGGCTGT<br>CTCGTCTCGTCTCCGGAAGACATGCTT<br>AGGAGCCTGCATTAGGATCGATCTCG<br>ATCCCGCGAAATTAATACGACTCACTA<br>TAGGGAGCTGTCACCGGATGTGCTTT<br>CCGGTCTGATGAGTCCGTGAGGACGA<br>AACAGCCTCTACAAATAATTTTGTTTAA<br>TACTAGACAGAAA | Bsal gBlock      | 4-Oligo<br>PCR                    | This study                                                                      |
| 293_TermT7_Rw<br>(Adapter oligo)        | GGGTGGAAGGGCTCGGAGTTGTGGTA<br>ATCTATGTATCCTGGCCGCGCGCGGC<br>TTGGATTCTGCGTTTGTTCCTGCTAC<br>GAACTCCCAGCCTGAAGACATGACAA<br>AGCGAGGTTTTTCAGCAAAAACCCCTC<br>AAGACCCGTTTAGAGGCCCAAGGGG<br>TTATGCTAGTTATTGCTCAGCGGCCTA<br>GGCGACCT          | Bsal gBlock      | 4-Oligo<br>PCR                    | This study                                                                      |
| 298_Bsal_Core-Fw                        | acgaaacagcctctcaaaataattttgtaatactagac<br>agaaacagaggagatgcaATGGGGAAAAA<br>GGCCGAATA                                                                                                                                                 | Bsal gBlock      | 4-Oligo<br>PCR                    | This study                                                                      |
| 299_Bsal_Core-Rv                        | atgctagtattgctcagcggcctagcgacctTCAAT<br>CCAGATCGGCAAAG                                                                                                                                                                               | Bsal gBlock      | 4-Oligo<br>PCR                    | This study                                                                      |
| Core-Fw<br>Backbone                     | acgaaacagcctctcaaaataattttgtaatactagac<br>agaaacagaggagatgca <b>ATG-N<sub>15-23</sub></b>                                                                                                                                            | Any template     | 4-Oligo<br>PCR                    | This study                                                                      |
| Core-Rv<br>Backbone                     | atgctagtattgctcagcggcctagcgacct <b>N<sub>18-23</sub></b><br>(Stop codon must be included)                                                                                                                                            | Any template     | 4-Oligo<br>PCR                    | This study                                                                      |
| 272_ACTB-F3                             | AGTACCCCATCGAGCAGC                                                                                                                                                                                                                   | ActinB<br>gBlock | LAMP<br>assay                     | SARS-<br>CoV-2<br>Rapid<br>Colorimet<br>ric LAMP<br>Assay Kit<br>NEB<br>#E2019S |
| 273_ACTB-B3                             | AGCCTGGATAGCAACGTACA                                                                                                                                                                                                                 | ActinB<br>gBlock | LAMP<br>assay                     |                                                                                 |
| 274_ACTB-FIP                            | GAGCCACACGCAGCTCATTGTATCAC<br>CAACTGGGACGACA                                                                                                                                                                                         | ActinB<br>gBlock | LAMP<br>assay                     |                                                                                 |
| 275_ACTB-BIP                            | CTGAACCCCAAGGCCAACCGGCTGGG<br>GTGTTGAAGGTC                                                                                                                                                                                           | ActinB<br>gBlock | LAMP<br>assay                     |                                                                                 |



|             |                         |                  |               |  |
|-------------|-------------------------|------------------|---------------|--|
| 276_ACTB-LF | TGTGGTGCCAGATTTTCTCCA   | ActinB<br>gBlock | LAMP<br>assay |  |
| 277_ACTB-LB | CGAGAAGATGACCCAGATCATGT | ActinB<br>gBlock | LAMP<br>assay |  |

**Table S12.-** Sequences used in this study

| Name        | Sequence (5'→3')                                                                                                                                                                                                                                                                                                                                                                                                                                                                                                                                                                                                                                                                                                                                                                                                                                                                                                                                                                                                                                                                                                                                                                                                                                                                                                                                                                                                                                                                                                                                                                                                                                                                                                                                       | Reference              |
|-------------|--------------------------------------------------------------------------------------------------------------------------------------------------------------------------------------------------------------------------------------------------------------------------------------------------------------------------------------------------------------------------------------------------------------------------------------------------------------------------------------------------------------------------------------------------------------------------------------------------------------------------------------------------------------------------------------------------------------------------------------------------------------------------------------------------------------------------------------------------------------------------------------------------------------------------------------------------------------------------------------------------------------------------------------------------------------------------------------------------------------------------------------------------------------------------------------------------------------------------------------------------------------------------------------------------------------------------------------------------------------------------------------------------------------------------------------------------------------------------------------------------------------------------------------------------------------------------------------------------------------------------------------------------------------------------------------------------------------------------------------------------------|------------------------|
| <b>Bsal</b> | ATGGGGAAAAGGCCGAATATGGACAGGGTCATC<br>CTATCTTCCTTGAGTACGCTGAACAGATCATTCAA<br>CACAAGGAGTACCAGGGTATGCCAGATCTGCGTT<br>ATCCGGATGGGCGTATTCAGTGGGAGGCACCTTC<br>TAACCGTAAATCGGGCATCTTTAAAGACACCAACA<br>TCAAGCGTCGTAATGGTGGGAGCAAAAAGCGAT<br>CTCCATTGGAATCGACCCTTCTTCGAATCAGTGGA<br>TCTCCAAGACAGCGAAATTAATCCACCCGACAAT<br>GCGTAAACCCTGTAAGAAGTGTGGACGTATTATG<br>GATCTTCGCTACTCGTATCCCACAAAAACCTGAT<br>CAAGCGCATCCGTAAGTTACCATATGTCGACGAA<br>TCTTTTGAATCGACTCACTGGAGCATATTCTGAA<br>GCTGATCAAACGCTTGGTATTACAATATGGGGAC<br>AAAGTTTATGACGATTTACCCAAGCTGTAACTTG<br>TAAAGCGGTTAAAAACATTCTCGTTTGGGAAATG<br>ATCTGGACACGTGGTTAAACTGGATTGACTCCGT<br>CTATATCCCTAGCGAACCATCAATGCTGTCACCG<br>GGAGCTATGGCTAATCCACCAGATCGCTTGGACG<br>GGTTCCACTCCCTTAATGAGTGCTGTCGTAGTCAT<br>GCGGATCGTGGCCGCTGGGAAAAGAATCTTCGCT<br>CTTATACAACTGATCGTCGCGCATTCGAATACTGG<br>GTCGATGGAGACTGGGTAGCGGCTGATAAATTAA<br>TGGGACTTATCCGTACCAATGAGCAAATCAAGAA<br>GGAAACATGTTTTAAACGATAACCACCCTGGTCCTT<br>GCAGTGCCGATCATATCGGTCCGATCTCTCTGGG<br>ATTTGTCCATCGTCCTGAATTTCAACTGCTTTGTA<br>ACTCCTGTAATTCTGCAAAGAACAACCGTATGACT<br>TTCAGCGACGTTTACGCATCTTATCAACGCCGAAAA<br>TAATGGCGAAGAGGTCGCCAGTTGGTACTGTAAA<br>CATATCTGGGACTTACGCAAACATGACGTAAAGAA<br>CAATGAAAATGCGTTACGCCTTAGTAAGATCCTTC<br>GTGACAACCGTCACACTGCGATGTTTATTCTTAGT<br>GAGCTTTTGAAGACAATCATTATCTGTTCCCTTTC<br>AACGTTTTTAGGCCTTCAATATGCAGAGCGTTCAG<br>TGTCTTTTCTAACATCAAGATTGAAAATCACATCA<br>TACTGGGCAGATCTCGGAACAACCCCGTGACAC<br>TAAATATACAGAAGAACA AAAAGCTCGCCGCATG<br>CGCATCGGCTTTGAAGCCCTTAAGAGTTACATCG<br>AAAAGGAGAACCGCAACGCCCTTTTGGTGATCAA<br>TGATAAGATCATCGACAAAATCAATGAAATCAAGA<br>ACATCCTTCAGGACATTCCCGATGAATACAAGTTA<br>TTAAACGAGAAAATCAGTGAGCAATTCAATAGCGA<br>GGAAGTCTCTGATGAATTGTTGCGTGATTTGGTTA<br>CACACCTGCCTACGAAGGAATCAGAGCCAGCAA | GenBank:<br>AY453694.1 |

|               |                                                                                                                                                                                                                                                                                                                                                                                                                                                                                                                                                                                                                                                                                                                                                                                                                          |                                            |
|---------------|--------------------------------------------------------------------------------------------------------------------------------------------------------------------------------------------------------------------------------------------------------------------------------------------------------------------------------------------------------------------------------------------------------------------------------------------------------------------------------------------------------------------------------------------------------------------------------------------------------------------------------------------------------------------------------------------------------------------------------------------------------------------------------------------------------------------------|--------------------------------------------|
|               | CTTTAAGCTGGCGCGCAAGTATTTACAAGAGATCA<br>TGGAAATCGTAGGGGACGAACTGTCCAAGATGTG<br>GGAGGACGAACGCTATGTTCCGCCAGACCTTTGCC<br>GATCTGGATTGA                                                                                                                                                                                                                                                                                                                                                                                                                                                                                                                                                                                                                                                                                         |                                            |
| <b>ActinB</b> | TTCCTATGTGGGCGACGAGGCCAGAGCAAGAG<br>AGGCATCCTCACCCCTGAAGTACCCCATCGAGCAC<br>GGCATCGTCACCAACTGGGACGACATGGAGAAAA<br>TCTGGCACACACCTTCTACAATGAGCTGCGTGT<br>GGCTCCCAGGAGCACCCCGTGCTGCTGACCGA<br>GGCCCCCTGAACCCCAAGGCCAACC GCGAGAA<br>GATGACCCAGATCATGTTTGAGACCTTCAACACC<br>CCAGCCATGTACGTTGCTATCCAGGCTGTGCTAT<br>CCCTGTACGCCTCTGGCCGTACCACTGGCATCGT<br>GATGGACTC                                                                                                                                                                                                                                                                                                                                                                                                                                                               | NCBI Reference<br>Sequence:<br>NM_001101.5 |
| <b>mTFP</b>   | ATGGTGAGCAAGGGCGAGGAAACCACAATGGGC<br>GTAATCAAGCCCGACATGAAGATCAAGCTGAAGA<br>TGGAGGGCAACGTGAATGGCCACGCCTTCGTGAT<br>CGAGGGCGAGGGCGAGGGCAAGCCCTACGACG<br>GCACCAACACCATCAACCTGGAGGTGAAGGAGG<br>GAGCCCCCTGCCCTTCTCCTACGACATTCTGAC<br>CACCGCGTTCGCCTACGGCAACAGGGCCTTACC<br>AAGTACCCCGACGACATCCCCAACTACTTCAAGC<br>AGTCCTTCCCCGAGGGGCTACTCTTGGGAGCGCAC<br>CATGACCTTCGAGGACAAGGGCATCGTGAAGGTG<br>AAGTCCGACATCTCCATGGAGGAGGACTCCTTCA<br>TCTACGAGATACACCTCAAGGGCGAGAATTCCC<br>CCCCAACGGCCCCGTGATGCAGAAGAAAACCACC<br>GGCTGGGACGCCTCCACCGAGAGGATGTACGTG<br>CGCGACGGCGTGCTGAAGGGCGACGTCAAGCAC<br>AAGCTGCTGCTGGAGGGCGGCGGCCACCACCGC<br>GTTGACTTCAAGACCATCTACAGGGCCAAGAAGG<br>CGGTGAAGCTGCCCGACTATCACTTTGTGGACCA<br>CCGCATCGAGATCCTGAACCACGACAAGGACTAC<br>ACAAGGTGACCGTTTACGAGAGCGCCGTGGCC<br>CGCAACTCCACCGACGGCATGGACGAGCTGTACA<br>AGTAA | Ai, et al., 2006 <sup>6</sup>              |
| <b>RRvT</b>   | ATGGTGAGCAAGGGCGAGGAGGTGATCAAGGAA<br>TTCATGAGGTTCAAGGTGAGGATGGAGGGCTCCA<br>TGAATGGACATGAGTTTGAATTGAAGGAGAGGG<br>AGAGGGACGCCCTTATGAAGGCACCCAGACCGC<br>CAAGCTGAAGGTGACCAAGGGCGGCCCCCTGCC<br>CTTCGCCTGGGACATTCTGTCCCCTCAGTTTATGT<br>ATGGATCTAAGGCTTATGTCAAACATCCTGCTGAT<br>ATTCCCGACTACAAGAAGCTGAGCTTCCCCGAGG<br>GCTTCAAGTGGGAGAGGGTTATGAACTTCAAGA<br>TGGAGGACTGGTCACAGTCACACAGGATTCTCC<br>CTGCAGGATGGAACACTGATTTACAATGTGAAGAT<br>GAGGGGCACCAACTTTCCACCCGACGGCCCCGT<br>GATGCAAAAAGAAAACAATGGGATGGGAGGCTTCC<br>ACAGAACGCCTGTATCCTCGTGATGGAGTCCTGA<br>AAGGAGAGATCCACCAGGCCCTGAAGCTGAAGG<br>ACGGCGGCCACTACCTGGTGGAGTTTAAGACCAT                                                                                                                                                                                                 | Wiens et al., 2016 <sup>7</sup>            |

|                        |                                                                                                                                                                                                                                                                                                                                                                                                                                                                                                                                                                                                                                                                                                                                                                                                                                                                                                                                                                                                                                                                                               |                                                |
|------------------------|-----------------------------------------------------------------------------------------------------------------------------------------------------------------------------------------------------------------------------------------------------------------------------------------------------------------------------------------------------------------------------------------------------------------------------------------------------------------------------------------------------------------------------------------------------------------------------------------------------------------------------------------------------------------------------------------------------------------------------------------------------------------------------------------------------------------------------------------------------------------------------------------------------------------------------------------------------------------------------------------------------------------------------------------------------------------------------------------------|------------------------------------------------|
|                        | <p>TTATATGGCTAAAAACCTGTCCAACCTGCCTGGAT<br/> ATTATTATGTGATACAAAACCTGGACATCACCAGC<br/> CACAACGAGGACTACACCATCGTGGAGCAGTACG<br/> AGAGGAGCGAGGGCCGCCATCATCTGTTCCCTCTA<br/> TGGAATGGATGAACTCTATAAAGGCAGCACCGGC<br/> AGCGGCAGCTCCGGCCCCATGGTTTCAAAGGA<br/> GAAGAAGCCATTAAGAGTTTATGCGCTTCAAAGT<br/> CAGCATGGAAGGCAGCATGAACGGCCACGAGTT<br/> CGAGATCGAGGGCGAGGGCGAGGGCAGGGCCCTA<br/> CGAGGGAACACAGACAGCTAAACTGAAAGTCACA<br/> AAAGGAGGACCTCTGCCTTTGCTTGGGATATCC<br/> TGAGCCCCAGTTTCATGTACGGCAGCAAGGCCTA<br/> CGTGAAGCACCCCGCCGACATCCCTGATTATAAA<br/> AAACTGTCTTTCTGAAGGATTCAGATGGGAAC<br/> GCGTCATGAATTTGAGGACGGCGGCCTGGTGA<br/> CCGTGACCCAGGACAGCAGCATCCAGGACGGCA<br/> CCCTGATCTATAAAGTCAAAGTGCGCGGAACAAA<br/> TTTCCCTCCTGATGGACCTGTCATGCAGAAAAAAA<br/> CCATGGGCTGGGAAGCCAGCACCGAGAGGCTGT<br/> ACCCAGGGACGGCGTGCTGAAGGGCGAAATTC<br/> ATCAGGCTCTGAAACTGAAAGATGGAGGACATTA<br/> TCTGGTTCGAATTCAAAACAATCTACATGGCCAAGA<br/> AGCCCGTGCAGCTCCCCGGCTACTACTACGTGGA<br/> CACCAAGCTGGATATTACATCCATAATGAAGATT<br/> ATACAGTTGTCGAACAGTATGAACGCTCCGAAGG<br/> AAGGCACCACCTCTTTCTGTACGGCATGGACGAG<br/> CTGTACAAGTAA</p> |                                                |
| <p><b>mScarlet</b></p> | <p>ATGGTGAGCAAGGGCGAGGCAGTGATCAAGGAG<br/> TTCATGCGGTTCAAGGTGCACATGGAGGGCTCCA<br/> TGAACGGCCACGAGTTTCGAGATCGAGGGCGAGG<br/> GCGAGGGCCGCCCTACGAGGGCACCCAGACCG<br/> CCAAGCTGAAGGTGACCAAGGGTGGCCCCCTGC<br/> CCTTCTCCTGGGACATCCTGTCCCCTCAGTTCAT<br/> GTACGGCTCCAGGGCCTTCATCAAGCACCCCGCC<br/> GACATCCCCGACTACTATAAGCAGTCCTTCCCCG<br/> AGGGCTTCAAGTGGGAGCGCGTGATGAACTTCGA<br/> GGACGGCGGCGCCGTGACCGTGACCCAGGACAC<br/> CTCCCTGGAGGACGGCACCCCTGATCTACAAGGTG<br/> AAGCTCCGCGGCACCAACTTCCCTCCTGACGGCC<br/> CCGTAATGCAGAAGAAGACAATGGGCTGGGAAGC<br/> GTCCACCGAGCGGTTGTACCCCGAGGACGGCGT<br/> GCTGAAGGGCGACATTAAGATGGCCCTGCGCCT<br/> GAAGGACGGCGGCCGCTACCTGGCGGACTTCAA<br/> GACCACCTACAAGGCCAAGAAGCCCGTGCAGATG<br/> CCCGGCGCCTACAACGTCGACCGCAAGTTGGAC<br/> ATCACCTCCCACAACGAGGACTACACCGTGGTGG<br/> AACAGTACGAACGCTCCGAGGGCCGCCACTCCA<br/> CCGGCGGCATGGACGAGCTGTACAAGTAA</p>                                                                                                                                                                                                                                   | <p>Bindels, et al.,<br/> 2017 <sup>8</sup></p> |

**Table S13.- Ultra-low-cost (ULC) cell-free formulation based on PEP for fresh samples**

**A) ULC-PEP cell-free reaction**

| Precursor solution    | Required quantity ( $\mu\text{L}$ ) |
|-----------------------|-------------------------------------|
| 1) 96.4 mM lactose    | 1.4                                 |
| 2) 40% PEG-8000       | 0.6                                 |
| 3) DNA (20 nM)        | 3                                   |
| 4) 4x ULC- Wizard mix | 3                                   |
| 5) Cell extract       | 4                                   |
| Final volume          | 12                                  |

**B) 4X ULC-PEP Wizard mix**

| Precursor solution            | Required quantity ( $\mu\text{L}$ ) |
|-------------------------------|-------------------------------------|
| 1) Autoclaved MQ water        | 120                                 |
| 2) 1000mM magnesium glutamate | 20*                                 |
| 3) 10x Salt solution mix**    | 200                                 |
| 4) 25x 19 Amino acid mix**    | 80                                  |
| 5) 25x PEP**                  | 80                                  |
| Final volume                  | 500                                 |

\* For a final concentration of 10 mM in ULC-cell-free reaction.

\*\*Detailed protocols for preparing all cell-free stock solutions used in this study are available at [protocols.io/researchers/fernando-guzman-chavez](https://protocols.io/researchers/fernando-guzman-chavez)

## REFERENCES

- [1] Arce, A., Guzman Chavez, F., Gandini, C., Puig, J., Matute, T., Haseloff, J., Dalchau, N., Molloy, J., Pardee, K., and Federici, F. (2021) Decentralizing Cell-Free RNA Sensing With the Use of Low-Cost Cell Extracts, *Frontiers in Bioengineering and Biotechnology* 9, 1-11.
- [2] Stark, J. C., Huang, A., Nguyen, P. Q., Dubner, R. S., Hsu, K. J., Ferrante, T. C., Anderson, M., Kanapskyte, A., Mucha, Q., Packett, J. S., Patel, P., Patel, R., Qaq, D., Zondor, T., Burke, J., Martinez, T., Miller-Berry, A., Puppala, A., Reichert, K., Schmid, M., Brand, L., Hill, L. R., Chellaswamy, J. F., Faheem, N., Fetherling, S., Gong, E., Gonzalzes, E. M., Granito, T., Koritsaris, J., Nguyen, B., Ottman, S., Palffy, C., Patel, A., Skweres, S., Slaton, A., Woods, T., Donghia, N., Pardee, K., Collins, J. J., and Jewett, M. C. (2018) BioBits Bright: A fluorescent synthetic biology education kit, *Sci Adv* 4, eaat5107.
- [3] Huang, A., Nguyen, P. Q., Stark, J. C., Takahashi, M. K., Donghia, N., Ferrante, T., Dy, A. J., Hsu, K. J., Dubner, R. S., Pardee, K., Jewett, M. C., and Collins, J. J. (2018) BioBits Explorer: A modular synthetic biology education kit, *Sci Adv* 4, eaat5105.
- [4] Mautner, L., Baillie, C. K., Herold, H. M., Volkwein, W., Guertler, P., Eberle, U., Ackermann, N., Sing, A., Pavlovic, M., Goerlich, O., Busch, U., Wassill, L., Huber, I., and Baiker, A.

- (2020) Rapid point-of-care detection of SARS-CoV-2 using reverse transcription loop-mediated isothermal amplification (RT-LAMP), *Virology* **17**, 1-14.
- [5] Gregor, C., Gwosch, K. C., Sahl, S. J., and Hell, S. W. (2018) Strongly enhanced bacterial bioluminescence with the lux operon for single-cell imaging, *Proc Natl Acad Sci U S A* **115**, 962-967.
- [6] Ai, H. W., Henderson, J. N., Remington, S. J., and Campbell, R. E. (2006) Directed evolution of a monomeric, bright and photostable version of Clavularia cyan fluorescent protein: structural characterization and applications in fluorescence imaging, *Biochem J* **400**, 531-540.
- [7] Wiens, M. D., Shen, Y., Li, X., Salem, M. A., Smisdom, N., Zhang, W., Brown, A., and Campbell, R. E. (2016) A Tandem Green-Red Heterodimeric Fluorescent Protein with High FRET Efficiency, *Chembiochem* **17**, 2361-2367.
- [8] Bindels, D. S., Haarbosch, L., van Weeren, L., Postma, M., Wiese, K. E., Mastop, M., Aumonier, S., Gotthard, G., Royant, A., Hink, M. A., and Gadella, T. W., Jr. (2017) mScarlet: a bright monomeric red fluorescent protein for cellular imaging, *Nat Methods* **14**, 53-56.
